# Supplementary material
Source: Royal Society of Chemistry journal article supplement (doi:10.1039/d6fo00282j)
Supplement: d6fo00282j1.pdf [file d6fo00282j1.pdf]

## Multi-omics reveals gut microbiome and metabolome-specific responses to sugar alcohols

Mengling Liu<sup>1,2,\*</sup>, Zhandong Yang<sup>3,\*,#</sup>, Boyu Liu<sup>2,4,\*</sup>, Hongbo Cheng<sup>4</sup>, Jiannan Qin<sup>2</sup>, Pingjun Zhang<sup>2</sup>, Tingfan Tang<sup>5</sup>, Fei Peng<sup>6</sup>, Jiguo Yang<sup>4</sup>, Ping Wei<sup>1,#</sup>, Huihui Su<sup>2,#</sup>

### Supplementary Figures

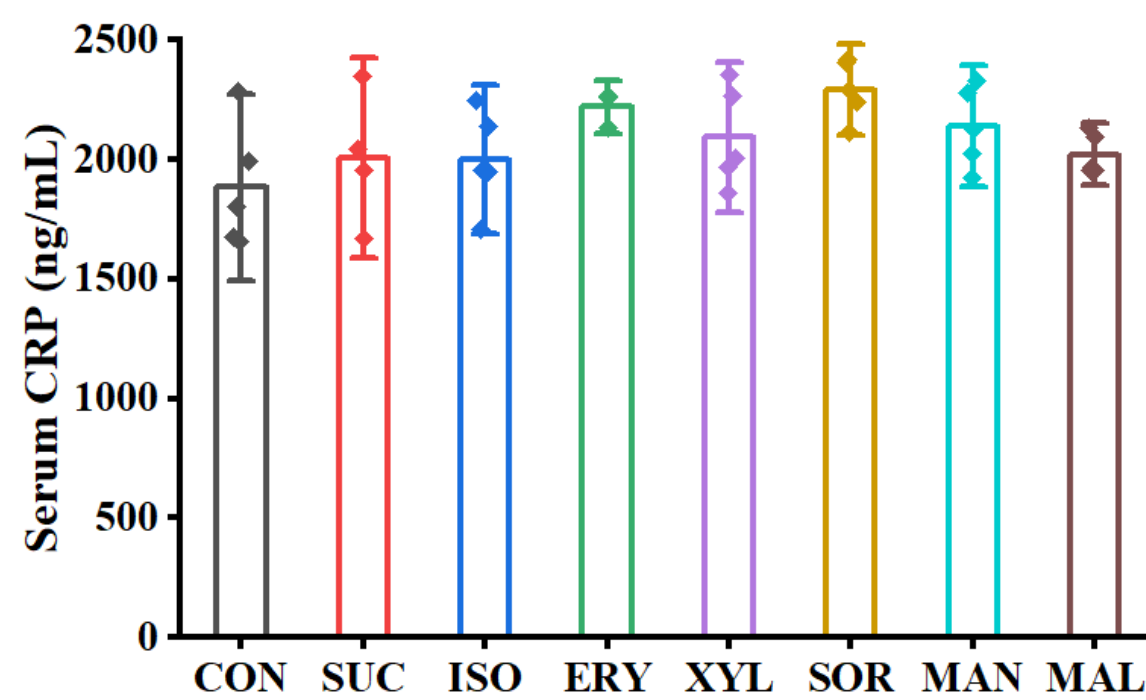

**Figure S1. Effects of polyols on circulating inflammation in rats.**  
CRP. C-reactive protein.

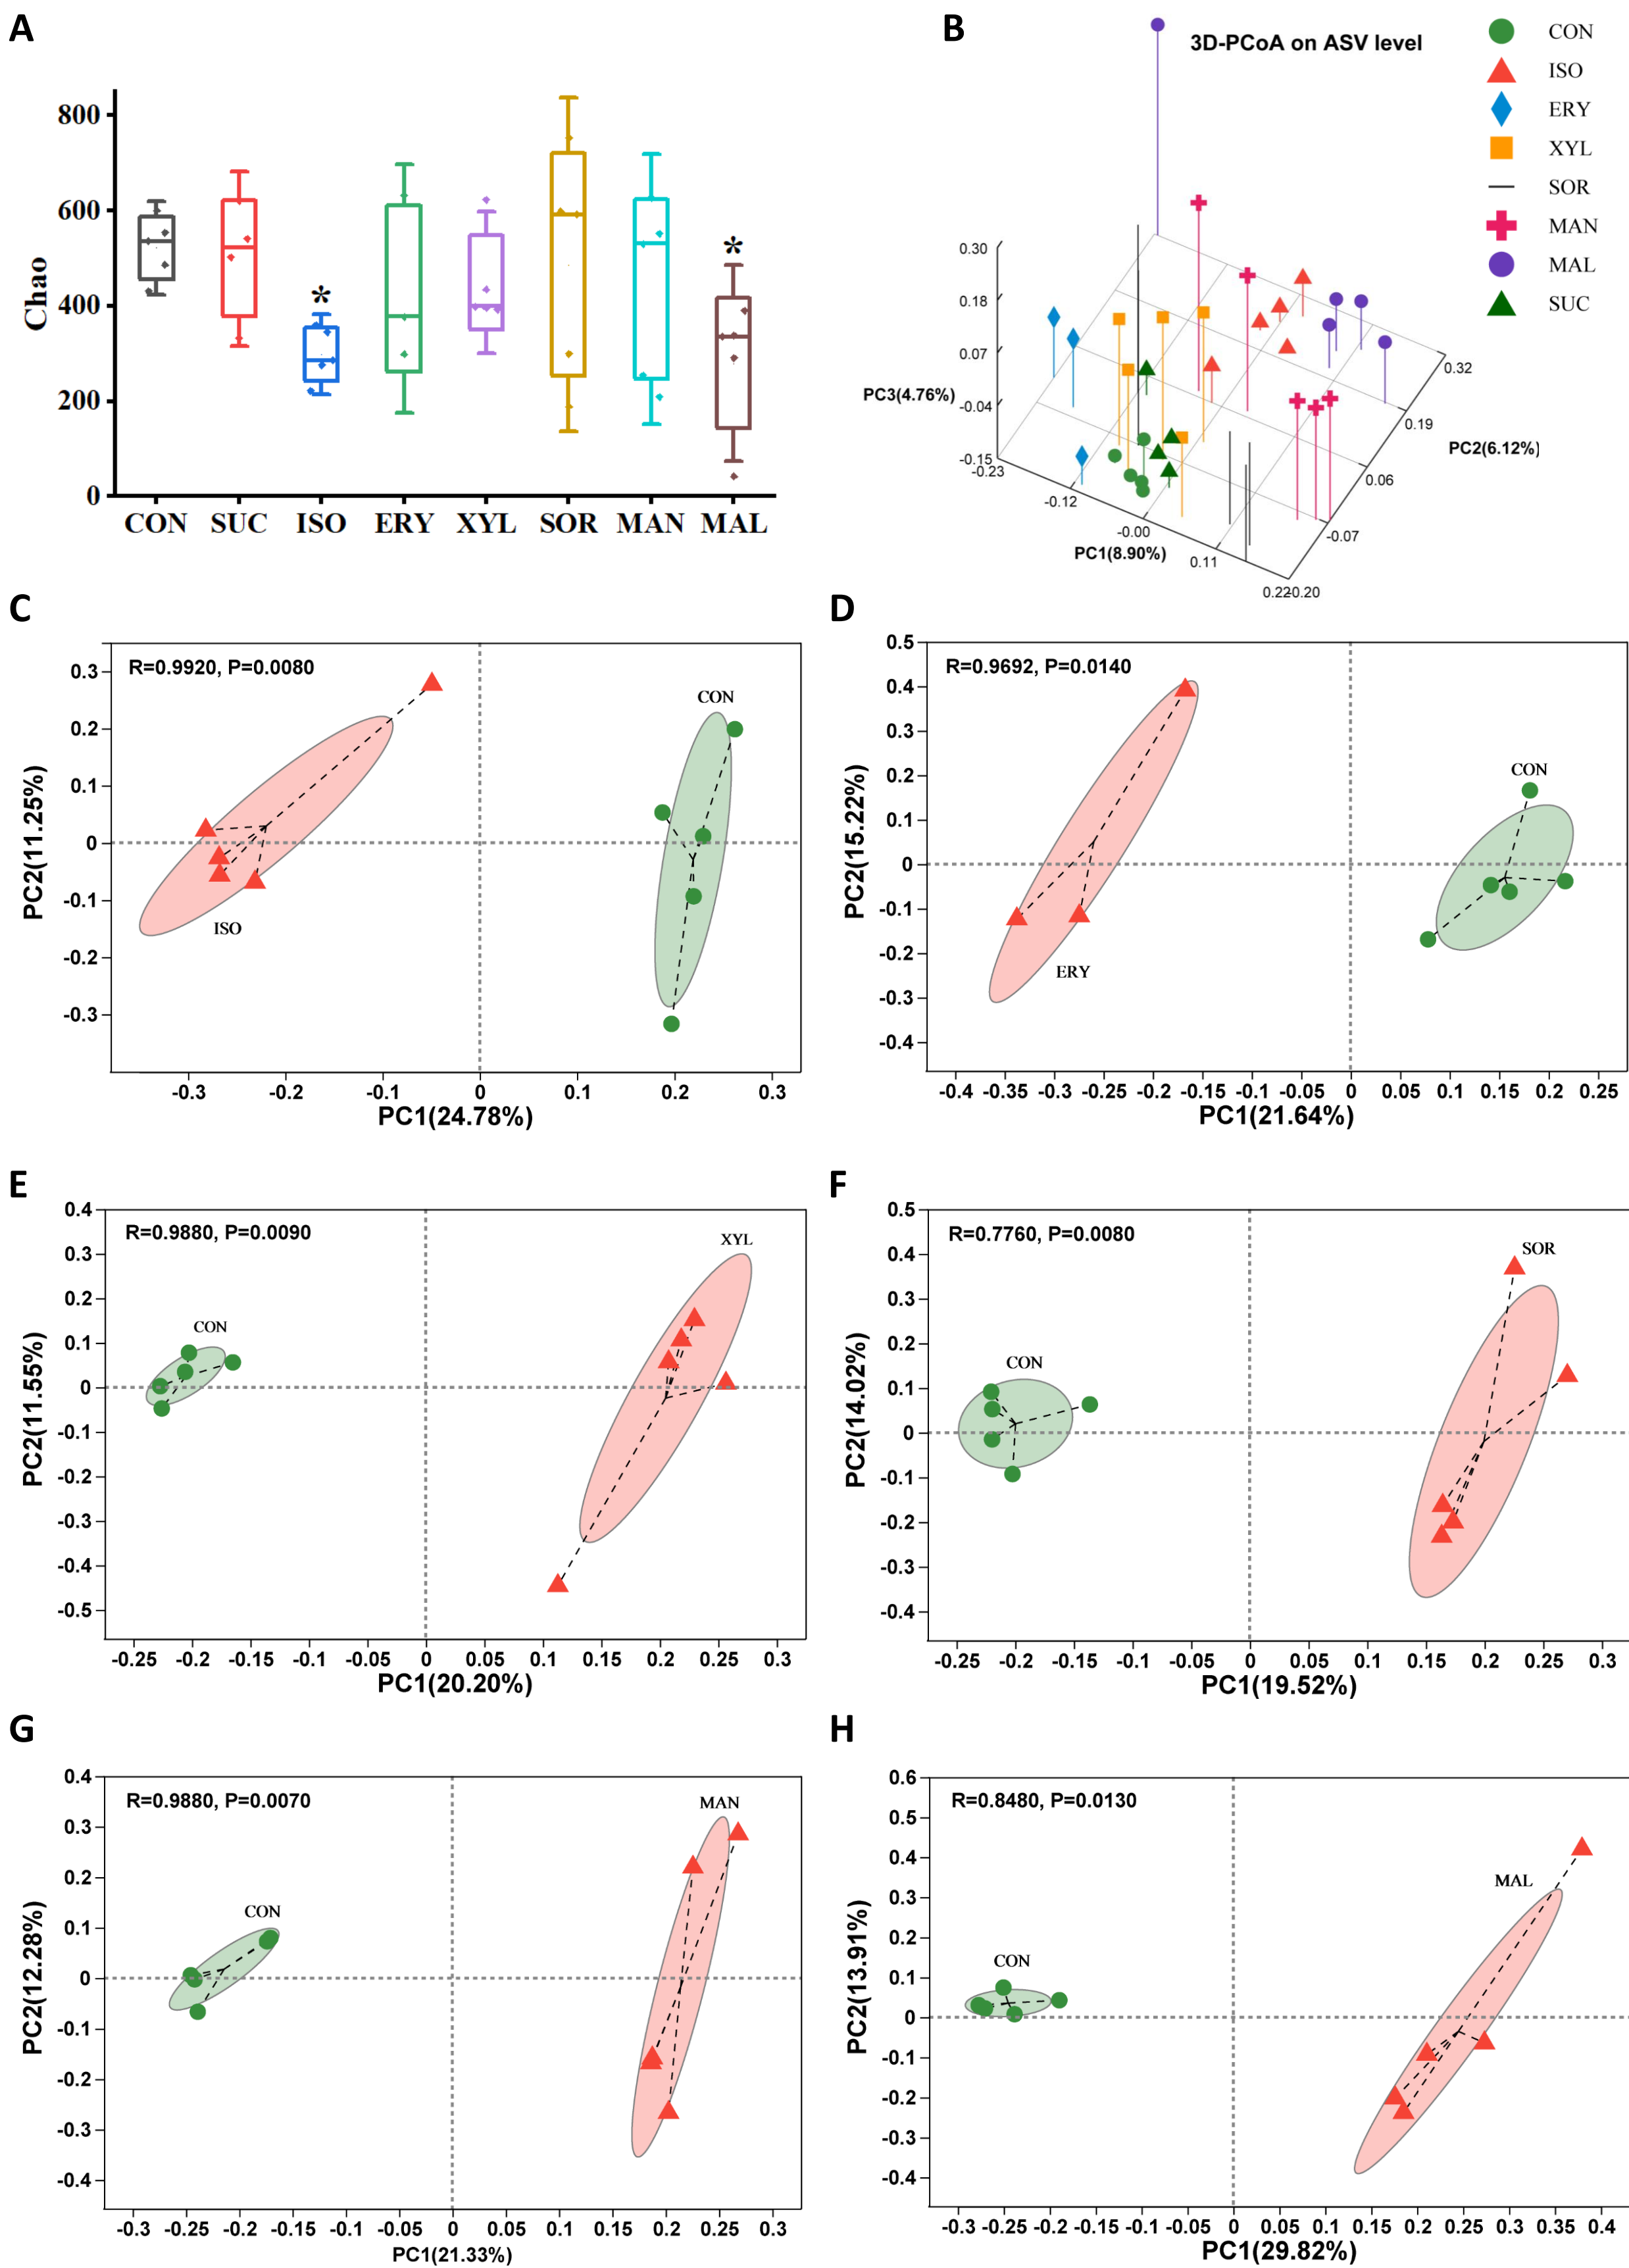

**Figure S2. Sugar alcohol regulated gut microbiota diversity in rats, including  $\alpha$ -diversity (A) and  $\beta$ -diversity (B-H).**  
 \* represented  $P < 0.05$  when compared to the control group.

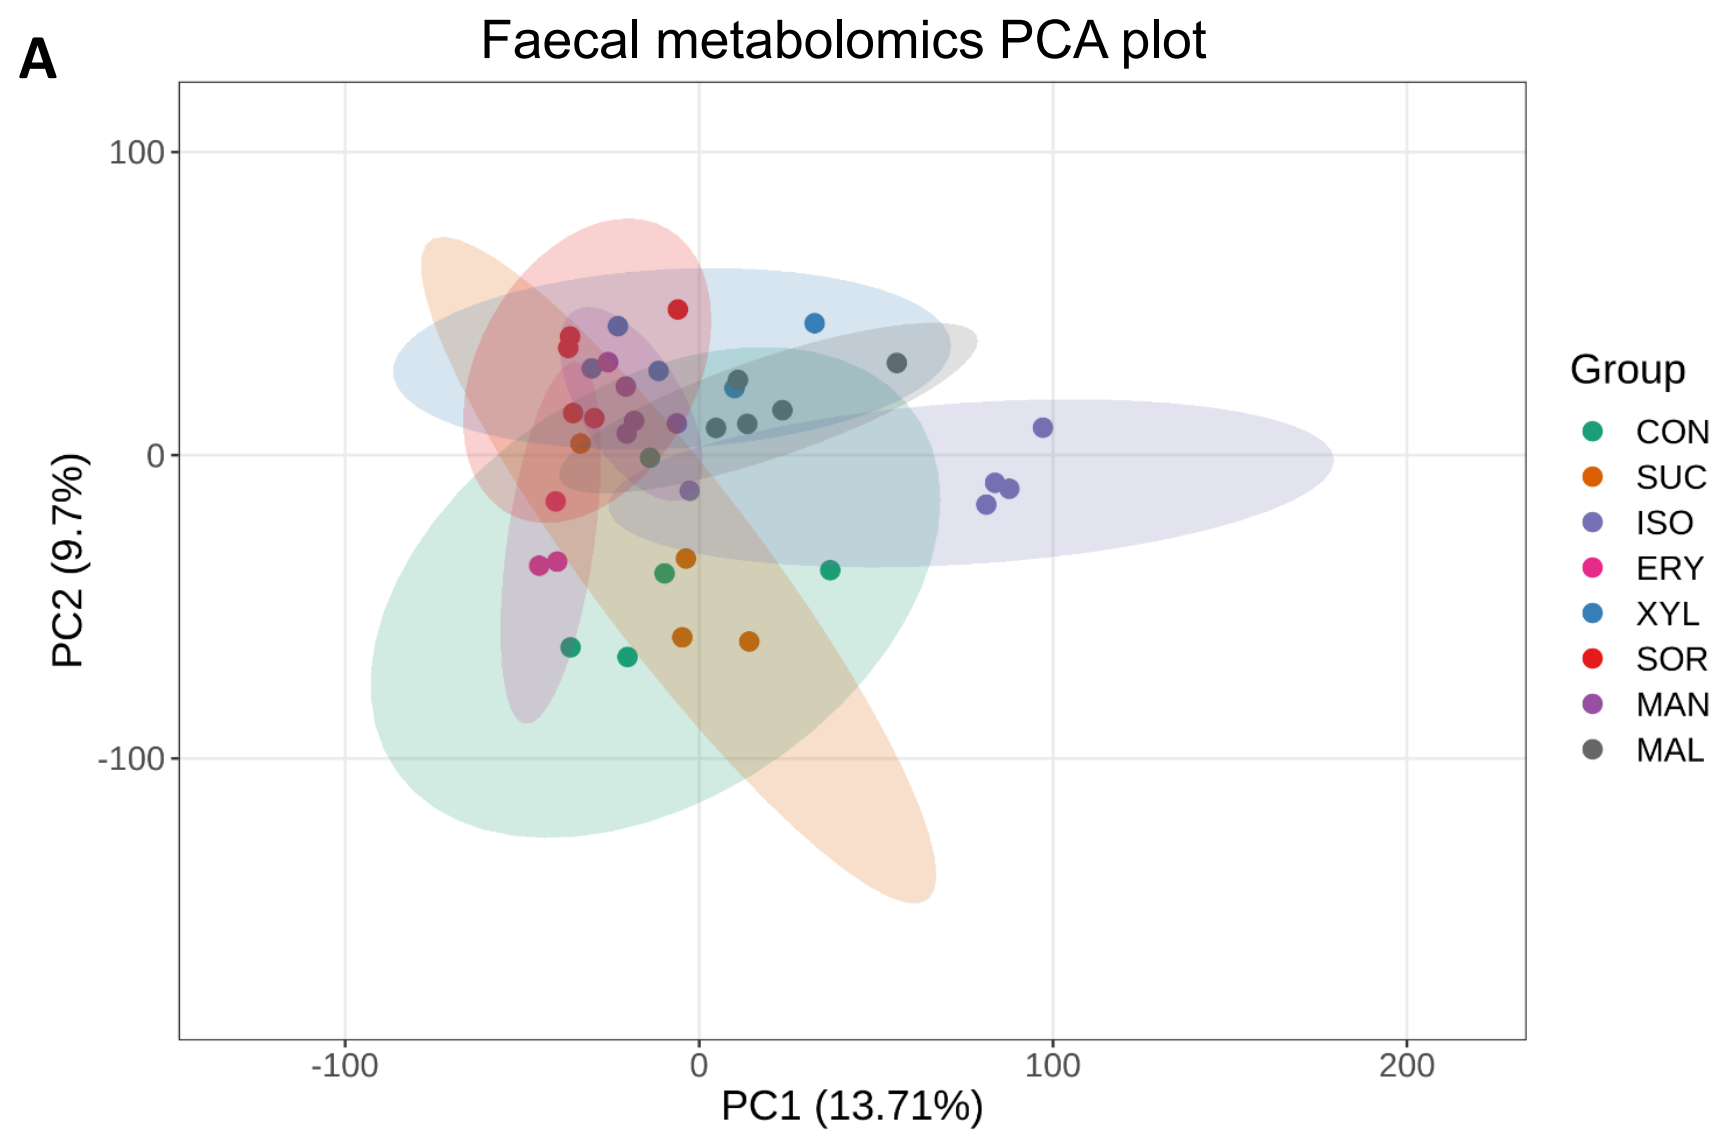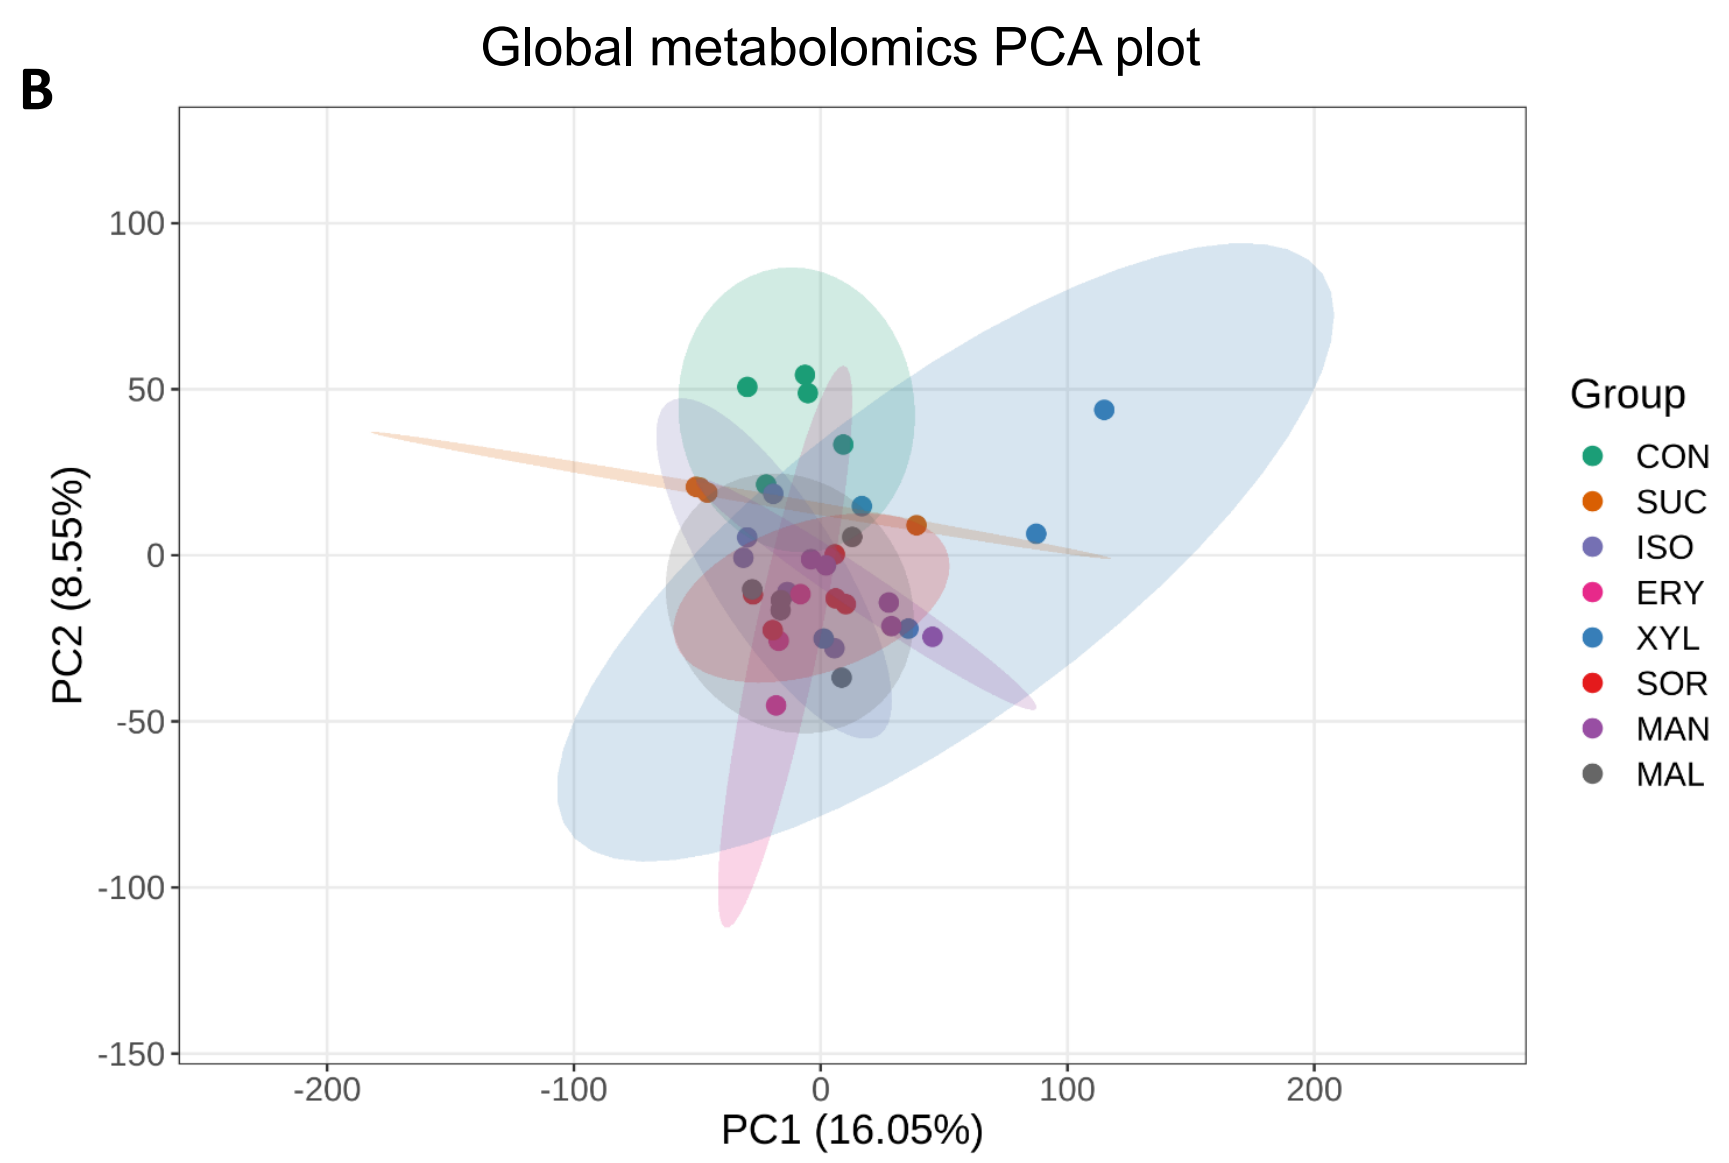

**Figure S3. Polyols significantly modulated stool and global metabolome, reflected by unsupervised principal component analysis (PCA).**
