# Supplementary material
Source: Royal Society of Chemistry journal article supplement (doi:10.1039/d6fo00282j)
Supplement: d6fo00282j2.pdf [file d6fo00282j2.pdf]

**Table S1 Identifying specific microbiota function responding to isomalt consumption via PICRUSt**

| <b>KEGG pathway</b>                          | <b>pvalue</b> | <b>KEGG pathway</b>                                        | <b>pvalue</b> |
|----------------------------------------------|---------------|------------------------------------------------------------|---------------|
| Biosynthesis of secondary metabolites        | 0.03619       | Glutamatergic synapse                                      | 0.006423      |
| Microbial metabolism in diverse environments | 0.01927       | AMPK signaling pathway                                     | 0.02881       |
| Biosynthesis of amino acids                  | 0.04883       | Peroxisome                                                 | 0.03091       |
| Carbon metabolism                            | 0.007137      | Chloroalkane and chloroalkene degradation                  | 0.001383      |
| ABC transporters                             | 0.0211        | PPAR signaling pathway                                     | 0.001915      |
| Glycolysis / Gluconeogenesis                 | 0.04956       | Nitrotoluene degradation                                   | 0.01639       |
| Pyruvate metabolism                          | 0.03012       | Various types of N-glycan biosynthesis                     | 0.008102      |
| Galactose metabolism                         | 0.008011      | Epithelial cell signaling in Helicobacter pylori infection | 0.01006       |
| Cysteine and methionine metabolism           | 0.008807      | Aminobenzoate degradation                                  | 0.03944       |
| Carbon fixation pathways in prokaryotes      | 0.0272        | RNA transport                                              | 0.01958       |
| Peptidoglycan biosynthesis                   | 0.02544       | Longevity regulating pathway - multiple species            | 0.00024       |
| Fructose and mannose metabolism              | 0.0168        | Protein processing in endoplasmic reticulum                | 0.0116        |
| Pentose phosphate pathway                    | 0.01635       | Biosynthesis of vancomycin group antibiotics               | 0.0125        |
| Propanoate metabolism                        | 0.1191        | Glucosinolate biosynthesis                                 | 0.023         |
| Pantothenate and CoA biosynthesis            | 0.002181      | Carbapenem biosynthesis                                    | 0.02447       |
| Terpenoid backbone biosynthesis              | 0.02582       | Platinum drug resistance                                   | 0.03354       |
| Thiamine metabolism                          | 0.01447       | Cushing syndrome                                           | 0.03271       |
| Nucleotide excision repair                   | 0.01636       | Renal cell carcinoma                                       | 0.006392      |
| Fatty acid metabolism                        | 0.007157      | Shigellosis                                                | 0.02714       |
| Glycerolipid metabolism                      | 0.005833      | Ether lipid metabolism                                     | 0.02614       |
| Valine, leucine and isoleucine biosynthesis  | 0.003387      | Choline metabolism in cancer                               | 0.003087      |

|                                          |          |                                             |          |
|------------------------------------------|----------|---------------------------------------------|----------|
| Pentose and glucuronate interconversions | 0.007035 | Axon regeneration                           | 0.02506  |
| Folate biosynthesis                      | 0.02866  | Phospholipase D signaling pathway           | 0.02506  |
| Arginine and proline metabolism          | 0.02729  | Arachidonic acid metabolism                 | 0.02215  |
| Selenocompound metabolism                | 0.02079  | Protein digestion and absorption            | 0.01042  |
| Biotin metabolism                        | 0.0243   | Non-alcoholic fatty liver disease (NAFLD)   | 0.02739  |
| Lysosome                                 | 0.007904 | Parkinson disease                           | 0.0128   |
| C5-Branched dibasic acid metabolism      | 0.005031 | Bacterial invasion of epithelial cells      | 0.0128   |
| Sulfur relay system                      | 0.004265 | Retrograde endocannabinoid signaling        | 0.01829  |
| Antifolate resistance                    | 0.01478  | Bile secretion                              | 0.01626  |
| Polyketide sugar unit biosynthesis       | 0.001628 | Gastric cancer                              | 0.01626  |
| Biofilm formation - Escherichia coli     | 0.01843  | Ethylbenzene degradation                    | 0.01624  |
| Monobactam biosynthesis                  | 0.007887 | Renin-angiotensin system                    | 0.000313 |
| Salmonella infection                     | 0.000954 | Toxoplasmosis                               | 0.01752  |
| Tuberculosis                             | 0.001417 | Mineral absorption                          | 0.0264   |
| Fluid shear stress and atherosclerosis   | 0.01124  | Meiosis - yeast                             | 0.04357  |
| Vitamin B6 metabolism                    | 0.04969  | Proteasome                                  | 0.005432 |
| Taurine and hypotaurine metabolism       | 0.005766 | Polycyclic aromatic hydrocarbon degradation | 0.005951 |
| Riboflavin metabolism                    | 0.02865  | Chagas disease (American trypanosomiasis)   | 0.002724 |
| Legionellosis                            | 0.006732 | Bladder cancer                              | 0.005002 |
| Degradation of aromatic compounds        | 0.000921 | cAMP signaling pathway                      | 0.004872 |
| NOD-like receptor signaling pathway      | 0.001104 | Basal transcription factors                 | 0.003986 |
| Cocaine addiction                        | 0.001308 | Alcoholism                                  | 0.001308 |
| Dopaminergic synapse                     | 0.001308 | Amphetamine addiction                       | 0.001308 |
| Serotonergic synapse                     | 0.001308 |                                             |          |

**Table S2 Identifying specific microbiota function responding to erythritol consumption via PICRUST**

| <b>KEGG pathway</b>                                        | <b>pvalue</b> | <b>KEGG pathway</b>                             | <b>pvalue</b> |
|------------------------------------------------------------|---------------|-------------------------------------------------|---------------|
| Pentose and glucuronate interconversions                   | 0.005794      | Salmonella infection                            | 0.02173       |
| Fatty acid biosynthesis                                    | 0.01839       | Pertussis                                       | 0.01565       |
| Synthesis and degradation of ketone bodies                 | 0.002151      | Tuberculosis                                    | 0.01517       |
| Primary bile acid biosynthesis                             | 0.01659       | Human papillomavirus infection                  | 0.004085      |
| Secondary bile acid biosynthesis                           | 0.01018       | Viral carcinogenesis                            | 0.004085      |
| Steroid hormone biosynthesis                               | 0.003281      | Renal cell carcinoma                            | 0.01176       |
| Photosynthesis                                             | 0.00513       | Hepatocellular carcinoma                        | 0.002671      |
| Arginine biosynthesis                                      | 0.02083       | Fluid shear stress and atherosclerosis          | 0.01381       |
| Glycine, serine and threonine metabolism                   | 0.008518      | Pyrimidine metabolism                           | 0.02325       |
| Monobactam biosynthesis                                    | 0.009689      | D-Arginine and D-ornithine metabolism           | 0.02294       |
| Cysteine and methionine metabolism                         | 0.01741       | C5-Branched dibasic acid metabolism             | 0.02271       |
| Lysine biosynthesis                                        | 0.009042      | Amoebiasis                                      | 0.02369       |
| Carbapenem biosynthesis                                    | 0.009691      | Central carbon metabolism in cancer             | 0.02431       |
| D-Glutamine and D-glutamate metabolism                     | 0.0131        | Starch and sucrose metabolism                   | 0.02516       |
| Lipopolysaccharide biosynthesis                            | 0.01523       | Nonribosomal peptide structures                 | 0.02541       |
| Glycerophospholipid metabolism                             | 0.0197        | Antifolate resistance                           | 0.02574       |
| Arabinogalactan biosynthesis - Mycobacterium               | 0.01907       | Citrate cycle (TCA cycle)                       | 0.02718       |
| Glycosphingolipid biosynthesis - globo and isoglobo series | 0.01716       | Fructose and mannose metabolism                 | 0.02693       |
| Carbon fixation in photosynthetic organisms                | 0.01973       | Longevity regulating pathway - multiple species | 0.02716       |
| Vitamin B6 metabolism                                      | 0.01496       | Proteoglycans in cancer                         | 0.02625       |
| Biotin metabolism                                          | 0.01466       | Other glycan degradation                        | 0.02909       |
| Lipoic acid metabolism                                     | 0.01448       | Polycyclic aromatic hydrocarbon degradation     | 0.02764       |

|                                       |          |                                                 |         |
|---------------------------------------|----------|-------------------------------------------------|---------|
| Terpenoid backbone biosynthesis       | 0.005852 | Fatty acid metabolism                           | 0.02844 |
| Caprolactam degradation               | 0.01636  | Biosynthesis of amino acids                     | 0.02891 |
| Flavone and flavonol biosynthesis     | 0.02031  | RNA polymerase                                  | 0.02934 |
| Glucosinolate biosynthesis            | 0.02145  | Longevity regulating pathway - worm             | 0.0288  |
| Aminoacyl-tRNA biosynthesis           | 0.01858  | Benzoate degradation                            | 0.03027 |
| Drug metabolism - other enzymes       | 0.01443  | Glucagon signaling pathway                      | 0.02998 |
| Metabolic pathways                    | 0.01039  | Valine, leucine and isoleucine biosynthesis     | 0.03069 |
| Biosynthesis of secondary metabolites | 0.01848  | 2-Oxocarboxylic acid metabolism                 | 0.03184 |
| beta-Lactam resistance                | 0.004874 | Ferroptosis                                     | 0.03177 |
| ABC transporters                      | 0.01758  | Necroptosis                                     | 0.03207 |
| Phosphotransferase system (PTS)       | 0.01893  | Various types of N-glycan biosynthesis          | 0.03339 |
| Ribosome biogenesis in eukaryotes     | 0.01873  | Peptidoglycan biosynthesis                      | 0.03363 |
| Ribosome                              | 0.01746  | Glycosphingolipid biosynthesis - ganglio series | 0.03338 |
| DNA replication                       | 0.01497  | Lysosome                                        | 0.03278 |
| PPAR signaling pathway                | 0.006694 | Sphingolipid metabolism                         | 0.03505 |
| Base excision repair                  | 0.02176  | Pentose phosphate pathway                       | 0.0362  |
| Nucleotide excision repair            | 0.01284  | Alanine, aspartate and glutamate metabolism     | 0.04235 |
| Mismatch repair                       | 0.008279 | Histidine metabolism                            | 0.04074 |
| Homologous recombination              | 0.01862  | D-Alanine metabolism                            | 0.0394  |
| HIF-1 signaling pathway               | 0.02075  | Amino sugar and nucleotide sugar metabolism     | 0.03998 |
| Cell cycle - Caulobacter              | 0.01311  | Lipoarabinomannan (LAM) biosynthesis            | 0.0397  |
| Sulfur relay system                   | 0.002572 | Zeatin biosynthesis                             | 0.04078 |
| Autophagy - yeast                     | 0.009513 | AMPK signaling pathway                          | 0.04046 |
| Apoptosis - fly                       | 0.01919  | Antigen processing and presentation             | 0.04228 |
| Renin-angiotensin system              | 0.00739  | IL-17 signaling pathway                         | 0.04228 |
| NOD-like receptor signaling pathway   | 0.01608  | Th17 cell differentiation                       | 0.04228 |
| Plant-pathogen interaction            | 0.01681  | Progesterone-mediated oocyte maturation         | 0.04228 |
| Glutamatergic                         | 0.01416  | Estrogen signaling                              | 0.04228 |

|                                        |           |                                                            |         |
|----------------------------------------|-----------|------------------------------------------------------------|---------|
| synapse                                |           | pathway                                                    |         |
| Insulin signaling pathway              | 0.0175    | Prolactin signaling pathway                                | 0.03931 |
| Thyroid hormone synthesis              | 0.009768  | Epithelial cell signaling in Helicobacter pylori infection | 0.0378  |
| Adipocytokine signaling pathway        | 0.02118   | Staphylococcus aureus infection                            | 0.03961 |
| Type II diabetes mellitus              | 0.004399  | Pathways in cancer                                         | 0.03984 |
| Cushing syndrome                       | 0.01176   | Prostate cancer                                            | 0.04228 |
| Mineral absorption                     | 0.003102  | Glycosaminoglycan degradation                              | 0.0435  |
| Alzheimer disease                      | 0.0121    | Glyoxylate and dicarboxylate metabolism                    | 0.04361 |
| Bacterial invasion of epithelial cells | 0.0007122 | Phenylpropanoid biosynthesis                               | 0.0447  |
| Pathogenic Escherichia coli infection  | 0.01234   | Linoleic acid metabolism                                   | 0.04546 |
| Aminobenzoate degradation              | 0.04666   | RNA transport                                              | 0.04601 |
| One carbon pool by folate              | 0.04757   | Penicillin and cephalosporin biosynthesis                  | 0.04802 |
| Apoptosis                              | 0.04728   | Prodigiosin biosynthesis                                   | 0.04806 |
| Thyroid hormone signaling pathway      | 0.04844   |                                                            |         |

**Table S3 Identifying specific microbiota function responding to eylitol consumption via PICRUSt**

| <b>KEGG pathway</b>                                    | <b>pvalue</b> | <b>KEGG pathway</b>                             | <b>pvalue</b> |
|--------------------------------------------------------|---------------|-------------------------------------------------|---------------|
| ABC transporters                                       | 0.0064887     | Metabolic pathways                              | 0.0061129     |
| Alanine, aspartate and glutamate metabolism            | 0.0090603     | MicroRNAs in cancer                             | 0.0099905     |
| Amino sugar and nucleotide sugar metabolism            | 0.0445786     | Microbial metabolism in diverse environments    | 0.0056212     |
| Aminoacyl-tRNA biosynthesis                            | 0.0447904     | Mismatch repair                                 | 0.0128221     |
| Amoebiasis                                             | 0.049086      | Neomycin, kanamycin and gentamicin biosynthesis | 0.0006868     |
| Autophagy - yeast                                      | 0.0001114     | Nicotinate and nicotinamide metabolism          | 0.0185625     |
| Bacterial invasion of epithelial cells                 | 0.0246079     | Nitrogen metabolism                             | 0.0475809     |
| Basal transcription factors                            | 0.0104633     | Nucleotide excision repair                      | 0.0257944     |
| Biosynthesis of amino acids                            | 0.0396475     | Oxidative phosphorylation                       | 0.0321354     |
| Biosynthesis of ansamycins                             | 0.0012312     | Pathways in cancer                              | 0.0007925     |
| Biosynthesis of secondary metabolites                  | 0.0067511     | Pentose and glucuronate interconversions        | 0.0368738     |
| Biosynthesis of various secondary metabolites - part 2 | 0.0007559     | Pentose phosphate pathway                       | 0.0154762     |
| Bladder cancer                                         | 0.0122155     | Peptidoglycan biosynthesis                      | 0.0411856     |
| Butanoate metabolism                                   | 0.0428755     | Pertussis                                       | 0.0305444     |
| Carbon fixation in photosynthetic organisms            | 0.0097389     | Photosynthesis                                  | 0.021938      |
| Carbon metabolism                                      | 0.0229893     | Polycyclic aromatic hydrocarbon degradation     | 0.0135013     |
| Cell cycle - Caulobacter                               | 0.0146054     | Polyketide sugar unit biosynthesis              | 0.0310148     |
| Chagas disease (American trypanosomiasis)              | 0.011617      | Prion diseases                                  | 0.0023246     |
| Cyanoamino acid metabolism                             | 0.0228137     | Prolactin signaling pathway                     | 0.0477923     |
| DNA replication                                        | 0.0343789     | Proteasome                                      | 0.0122992     |
| Drug metabolism - other enzymes                        | 0.0257192     | Purine metabolism                               | 0.0425457     |
| Flavone and flavonol biosynthesis                      | 0.0227242     | Pyrimidine metabolism                           | 0.0493156     |
| Folate biosynthesis                                    | 0.009976      | Pyruvate metabolism                             | 0.0403185     |
| Fructose and mannose metabolism                        | 0.0222391     | RNA degradation                                 | 0.0129427     |
| GABAergic synapse                                      | 0.0052768     | RNA transport                                   | 0.0377808     |
| Galactose metabolism                                   | 0.0229488     | Renin-angiotensin system                        | 0.0116358     |
| Glutamatergic synapse                                  | 0.0027024     | Riboflavin metabolism                           | 0.0083532     |

|                                     |           |                                  |           |
|-------------------------------------|-----------|----------------------------------|-----------|
| Glycerolipid metabolism             | 0.0253752 | Secondary bile acid biosynthesis | 0.0020085 |
| Glycerophospholipid metabolism      | 0.0214289 | Starch and sucrose metabolism    | 0.0198505 |
| HIF-1 signaling pathway             | 0.0376902 | Steroid hormone biosynthesis     | 0.0023164 |
| Homologous recombination            | 0.036604  | Streptomycin biosynthesis        | 0.0210548 |
| Human papillomavirus infection      | 0.0031168 | Sulfur relay system              | 0.0066912 |
| Inositol phosphate metabolism       | 0.0412234 | Terpenoid backbone biosynthesis  | 0.025495  |
| Lipoic acid metabolism              | 0.0215529 | Thiamine metabolism              | 0.0040972 |
| Lipopolysaccharide biosynthesis     | 0.0394751 | Two-component system             | 0.0474213 |
| Longevity regulating pathway - worm | 0.000708  | Type II diabetes mellitus        | 0.0034107 |
| Lysine biosynthesis                 | 0.041022  | Viral carcinogenesis             | 0.0031168 |
| Meiosis - yeast                     | 0.0192279 | cAMP signaling pathway           | 0.0124321 |

**Table S4 Identifying specific microbiota function responding to sorbitol consumption via PICRUST**

| KEGG pathway                                               | pvalue    | KEGG pathway                                            | pvalue    |
|------------------------------------------------------------|-----------|---------------------------------------------------------|-----------|
| Citrate cycle (TCA cycle)                                  | 0.03389   | Biosynthesis of ansamycins                              | 0.006053  |
| Pentose phosphate pathway                                  | 0.02409   | Biosynthesis of siderophore group nonribosomal peptides | 0.01801   |
| Ascorbate and aldarate metabolism                          | 0.03353   | Biosynthesis of vancomycin group antibiotics            | 0.02067   |
| Ubiquinone and other terpenoid-quinone biosynthesis        | 0.006369  | Metabolic pathways                                      | 0.02586   |
| Steroid hormone biosynthesis                               | 0.0009929 | Carbon metabolism                                       | 0.001861  |
| Oxidative phosphorylation                                  | 0.02209   | beta-Lactam resistance                                  | 0.000592  |
| Photosynthesis                                             | 0.005129  | Vancomycin resistance                                   | 0.01948   |
| Glycine, serine and threonine metabolism                   | 0.003066  | Antifolate resistance                                   | 0.00479   |
| Valine, leucine and isoleucine degradation                 | 0.01955   | ABC transporters                                        | 0.005786  |
| Benzoate degradation                                       | 0.01      | Two-component system                                    | 0.009185  |
| Tryptophan metabolism                                      | 0.0242    | Basal transcription factors                             | 0.003662  |
| Other glycan degradation                                   | 0.005457  | Proteasome                                              | 0.003579  |
| Various types of N-glycan biosynthesis                     | 0.01139   | PPAR signaling pathway                                  | 0.0005664 |
| Glycosaminoglycan degradation                              | 0.02885   | MAPK signaling pathway - yeast                          | 0.02598   |
| Lipopolysaccharide biosynthesis                            | 0.003729  | MAPK signaling pathway - fly                            | 0.00242   |
| Inositol phosphate metabolism                              | 0.01943   | cAMP signaling pathway                                  | 0.003442  |
| Ether lipid metabolism                                     | 0.01277   | FoxO signaling pathway                                  | 0.02337   |
| Arabinogalactan biosynthesis - Mycobacterium               | 0.0001506 | Phosphatidylinositol signaling system                   | 0.01125   |
| Arachidonic acid metabolism                                | 0.0014    | Meiosis - yeast                                         | 0.005441  |
| Linoleic acid metabolism                                   | 0.04386   | Sulfur relay system                                     | 7.06E-05  |
| alpha-Linolenic acid metabolism                            | 0.04557   | Lysosome                                                | 0.01369   |
| Sphingolipid metabolism                                    | 0.003756  | Peroxisome                                              | 0.0003227 |
| Glycosphingolipid biosynthesis - globo and isoglobo series | 0.004342  | Apoptosis                                               | 0.00476   |
| Glycosphingolipid biosynthesis - ganglio series            | 0.01139   | Longevity regulating pathway                            | 0.007433  |
| Polycyclic aromatic hydrocarbon degradation                | 0.003571  | Longevity regulating pathway - multiple species         | 0.0008084 |

|                                                        |           |                                        |           |
|--------------------------------------------------------|-----------|----------------------------------------|-----------|
| One carbon pool by folate                              | 0.03676   | Renin-angiotensin system               | 0.0001049 |
| Thiamine metabolism                                    | 0.003357  | Thermogenesis                          | 0.007097  |
| Lipoic acid metabolism                                 | 0.003765  | Glutamatergic synapse                  | 0.002827  |
| Carotenoid biosynthesis                                | 0.04864   | Insulin signaling pathway              | 0.04309   |
| Sulfur metabolism                                      | 0.041     | Prolactin signaling pathway            | 0.04754   |
| Caprolactam degradation                                | 0.0004116 | Adipocytokine signaling pathway        | 0.01112   |
| Phenylpropanoid biosynthesis                           | 0.003113  | Protein digestion and absorption       | 0.001335  |
| Flavone and flavonol biosynthesis                      | 0.03079   | Huntington disease                     | 0.001127  |
| Biosynthesis of various secondary metabolites - part 3 | 0.01225   | Bacterial invasion of epithelial cells | 1.34E-05  |
| Biosynthesis of various secondary metabolites - part 2 | 0.01182   | Pertussis                              | 0.002831  |
| Biosynthesis of unsaturated fatty acids                | 0.04663   | Bladder cancer                         | 0.003073  |

**Table S5 Identifying specific microbiota function responding to mannitol consumption via PICRUSt**

| <b>KEGG pathway</b>                         | <b>pvalue</b> | <b>KEGG pathway</b>                                     | <b>pvalue</b> |
|---------------------------------------------|---------------|---------------------------------------------------------|---------------|
| Metabolic pathways                          | 0.005293      | Phosphonate and phosphinate metabolism                  | 0.03729       |
| Carbon metabolism                           | 0.0006981     | Glucosinolate biosynthesis                              | 0.006744      |
| ABC transporters                            | 0.00017       | Insulin signaling pathway                               | 0.02715       |
| Two-component system                        | 0.004289      | Synthesis and degradation of ketone bodies              | 0.003594      |
| Peptidoglycan biosynthesis                  | 0.01388       | Zeatin biosynthesis                                     | 6.18E-05      |
| Alanine, aspartate and glutamate metabolism | 0.02728       | Longevity regulating pathway - multiple species         | 0.0002218     |
| Mismatch repair                             | 0.002362      | Type II diabetes mellitus                               | 0.0002218     |
| Glycine, serine and threonine metabolism    | 0.00161       | Biosynthesis of vancomycin group antibiotics            | 0.002754      |
| Carbon fixation pathways in prokaryotes     | 0.02575       | Ascorbate and aldarate metabolism                       | 0.01339       |
| Pentose phosphate pathway                   | 0.0008918     | Platinum drug resistance                                | 0.0004888     |
| Lysine biosynthesis                         | 0.03088       | Phenazine biosynthesis                                  | 0.02693       |
| Thiamine metabolism                         | 0.00163       | Drug metabolism - cytochrome P450                       | 0.04189       |
| Carbon fixation in photosynthetic organisms | 0.01629       | Proximal tubule bicarbonate reclamation                 | 0.00316       |
| Cell cycle - Caulobacter                    | 0.01922       | Prolactin signaling pathway                             | 0.0001121     |
| One carbon pool by folate                   | 0.04408       | Adipocytokine signaling pathway                         | 7.22E-05      |
| Fatty acid metabolism                       | 0.001377      | Lipoic acid metabolism                                  | 0.01123       |
| Fatty acid biosynthesis                     | 4.74E-06      | Amoebiasis                                              | 0.0006357     |
| Photosynthesis                              | 0.007632      | Huntington disease                                      | 0.0001478     |
| Bacterial chemotaxis                        | 0.02422       | Xylene degradation                                      | 7.79E-05      |
| Vancomycin resistance                       | 0.007284      | Limonene and pinene degradation                         | 0.0001469     |
| Folate biosynthesis                         | 0.008139      | MAPK signaling pathway - fly                            | 5.41E-05      |
| Sulfur relay system                         | 1.03E-06      | Steroid hormone biosynthesis                            | 1.88E-05      |
| Sulfur metabolism                           | 0.001871      | Atrazine degradation                                    | 0.001122      |
| C5-Branched dibasic acid metabolism         | 0.0001378     | Biosynthesis of siderophore group nonribosomal peptides | 0.0005789     |
| RNA polymerase                              | 0.0009791     | Pertussis                                               | 0.006171      |
| Cyanoamino acid metabolism                  | 0.001457      | Apoptosis                                               | 0.01894       |
| Longevity regulating pathway - worm         | 0.0001705     | Arachidonic acid metabolism                             | 0.005294      |

|                                                        |           |                                                 |           |
|--------------------------------------------------------|-----------|-------------------------------------------------|-----------|
| Monobactam biosynthesis                                | 0.0132    | Chlorocyclohexane and chlorobenzene degradation | 0.0004603 |
| Plant-pathogen interaction                             | 0.0003739 | Carotenoid biosynthesis                         | 0.000265  |
| Vitamin B6 metabolism                                  | 0.03269   | MAPK signaling pathway - yeast                  | 0.0009477 |
| Legionellosis                                          | 0.02951   | Prion diseases                                  | 0.001122  |
| Benzoate degradation                                   | 0.001284  | Biosynthesis of unsaturated fatty acids         | 0.04137   |
| Degradation of aromatic compounds                      | 0.0008387 | Steroid biosynthesis                            | 0.007375  |
| Glutamatergic synapse                                  | 5.36E-05  | Ether lipid metabolism                          | 0.02788   |
| Glycosaminoglycan degradation                          | 0.0001554 | Linoleic acid metabolism                        | 0.01772   |
| Lipopolysaccharide biosynthesis                        | 0.0005664 | Ethylbenzene degradation                        | 0.02113   |
| Inositol phosphate metabolism                          | 0.0001147 | Renin-angiotensin system                        | 6.86E-05  |
| Peroxisome                                             | 6.00E-05  | Caprolactam degradation                         | 0.0002884 |
| beta-Alanine metabolism                                | 0.001537  | Proteasome                                      | 0.005377  |
| Tryptophan metabolism                                  | 0.01572   | Meiosis - yeast                                 | 0.006111  |
| PPAR signaling pathway                                 | 8.02E-05  | Polycyclic aromatic hydrocarbon degradation     | 0.005651  |
| Biosynthesis of ansamycins                             | 0.01641   | Chagas disease (American trypanosomiasis)       | 0.0036    |
| Biosynthesis of various secondary metabolites - part 2 | 0.003756  | Bacterial invasion of epithelial cells          | 0.00752   |
| Secondary bile acid biosynthesis                       | 0.03199   | Bladder cancer                                  | 0.00501   |
| MicroRNAs in cancer                                    | 0.03184   | cAMP signaling pathway                          | 0.005367  |
| Phosphatidylinositol signaling system                  | 0.005088  | Basal transcription factors                     | 0.004424  |

**Table S6 Identifying specific microbiota function responding to maltitol consumption via PICRUSt**

| <b>KEGG pathway</b>                          | <b>pvalue</b> | <b>KEGG pathway</b>                                        | <b>pvalue</b> |
|----------------------------------------------|---------------|------------------------------------------------------------|---------------|
| Phenylpropanoid biosynthesis                 | 0.0003839     | Pyruvate metabolism                                        | 0.0009152     |
| ABC transporters                             | 4.81E-05      | Glycine, serine and threonine metabolism                   | 0.0001831     |
| Degradation of aromatic compounds            | 0.03324       | Tuberculosis                                               | 0.01919       |
| Photosynthesis                               | 4.15E-06      | Vancomycin resistance                                      | 0.001448      |
| Galactose metabolism                         | 0.005876      | Terpenoid backbone biosynthesis                            | 0.01239       |
| Starch and sucrose metabolism                | 0.03775       | Bacterial secretion system                                 | 0.00379       |
| C5-Branched dibasic acid metabolism          | 0.01665       | Peroxisome                                                 | 0.004046      |
| Cyanoamino acid metabolism                   | 0.002134      | Antifolate resistance                                      | 9.48E-05      |
| Pentose and glucuronate interconversions     | 0.008286      | Plant-pathogen interaction                                 | 0.002037      |
| Polyketide sugar unit biosynthesis           | 0.01049       | Longevity regulating pathway - worm                        | 0.0002029     |
| Sulfur relay system                          | 9.08E-05      | Vitamin B6 metabolism                                      | 0.002155      |
| Selenocompound metabolism                    | 0.0003059     | Biofilm formation - Vibrio cholerae                        | 0.0003437     |
| Methane metabolism                           | 0.0272        | Citrate cycle (TCA cycle)                                  | 0.002036      |
| Streptomycin biosynthesis                    | 0.004588      | Glycosphingolipid biosynthesis - globo and isoglobo series | 0.03151       |
| Glutamatergic synapse                        | 0.008654      | Phenylalanine metabolism                                   | 0.04216       |
| Thiamine metabolism                          | 0.01333       | Lysosome                                                   | 0.03177       |
| Peptidoglycan biosynthesis                   | 0.04713       | Lysine degradation                                         | 0.005072      |
| Microbial metabolism in diverse environments | 0.006231      | Valine, leucine and isoleucine degradation                 | 0.000128      |
| Carbon metabolism                            | 0.003195      | Ubiquinone and other terpenoid-quinone biosynthesis        | 0.002876      |
| RNA degradation                              | 0.009059      | Lipopolysaccharide biosynthesis                            | 0.001415      |
| One carbon pool by folate                    | 0.001654      | Flagellar assembly                                         | 0.005846      |
| Butanoate metabolism                         | 0.04161       | Glycosaminoglycan degradation                              | 0.004017      |
| Propanoate metabolism                        | 0.02564       |                                                            |               |

**Table S7 Shared microbiota species in type 2**

---

|                                                                  |                                                                      |
|------------------------------------------------------------------|----------------------------------------------------------------------|
| p__Bacteroidota.c__Bacteroidia.o__Bacteroidales.f__Rikenellaceae | p__Bacteroidota                                                      |
| p__Firmicutes.c__Bacilli.o__Lactobacillales.f__Aerococcaceae     | p__Firmicutes.c__Clostridia.o__Oscillospirales.f__Butyrivibrionaceae |
| p__Firmicutes.c__Bacilli.o__Lactobacillales.f__Streptococcaceae  | p__Firmicutes                                                        |
| p__Actinobacteriota                                              | p__Actinobacteriota.c__Coriobacteriia.o__Coriobacteriales            |
| p__Bacteroidota.c__Bacteroidia                                   | p__Actinobacteriota.c__Actinobacteria.o__Micrococcales               |
| p__Actinobacteriota.c__Coriobacteriia                            | p__Bacteroidota.c__Bacteroidia.o__Bacteroidales                      |

---

**Table S8 Shared stool metabolites in type 2**

---

|                                          |                                                  |
|------------------------------------------|--------------------------------------------------|
| Val-Glu-Arg-Gln-Val                      | Glu-Lys-Arg                                      |
| Thr-Ser-Arg-Ile-Ile                      | Ethephon                                         |
| Thr-Glu-Lys-Asp-Glu                      | 3-Cysteinyacetaminophen                          |
| Ser-Glu-Gln-Lys                          | (Aminomethyl)phosphonic acid                     |
| PGF2 dimethyl amide                      | TG(20:0/20:0/o-18:0)                             |
| Lys-Leu-Gln                              | Sandosapogenol                                   |
| Lys-Gln-Ile                              | Promazine                                        |
| Leu-Phe-Thr                              | Priverogenin A                                   |
| JWH182                                   | Masticadienonic acid                             |
| Ile-Glu-Tyr-Cys-Lys                      | Maslinic acid                                    |
| Ile-Asn-Val                              | Lucidenic acid M                                 |
| Hederagenin                              | L-Palmitoylcarnitine                             |
| Gly-Gly-Lys-Pro-Asn                      | Glycerol trilaurate                              |
| Endomorphin-1                            | Eplerenone                                       |
| Asn-Gly-Arg-Ile-Leu                      | Cortol                                           |
| Acetoxy-10-gingerol                      | 5alpha-Androstan-17beta-ol-3-one sulfate         |
| 3,4,6-Trichlorocatechol                  | 2-Octenoic acid                                  |
| 17-U-46619                               | 1-Behenoyl-2-hydroxy-sn-glycero-3-phosphocholine |
| Hesperetin dihydrochalcone               | (2S)-3-Hydroxypropane-1,2-diyl didecanoate       |
| N6DTC                                    | (+)-Ecdysterone                                  |
| NI3C                                     | Bis(4-Chlorophenyl)Acetic Acid                   |
| 1,6-Dibromo-1,6-dideoxy-D-mannitol       | 5BNDB                                            |
| Cyanate                                  | 2-Fluoromethamphetamine                          |
| Melperone                                | Bisphenol E                                      |
| Leucomycin A1                            | Carnitine C15:1                                  |
| Galegine                                 | Carnitine C16:1                                  |
| Ticarcillin                              | Cytarabine                                       |
| Oleanolic acid                           | LPC(O-16:0/2:0)                                  |
| N-Acetyl-L-Glutamic Acid                 | Metanephrine                                     |
| N-Acetylhistamine                        | Estriol                                          |
| N-3-Hydroxyoctanoyl-L-homoserine lactone | Goshonoside F7                                   |
| Leukotriene C4 methyl ester              |                                                  |

---

**Table S9 Shared global metabolites in type 2**

---

|                                     |                                                                                          |
|-------------------------------------|------------------------------------------------------------------------------------------|
| Ser-Arg-Ile-Lys                     | Lasalocid                                                                                |
| Leu-His-OH                          | Isovaleric acid                                                                          |
| Ile-Met-Gln                         | DG(18:0/20:4(5Z,8Z,11Z,14Z)/0:0)[iso2]                                                   |
| Glu-Lys-Leu-Thr-His                 | 3-methoxy Limaprost                                                                      |
| Ala-Ala-Ile                         | 1-(1Z-Octadecenyl)-2-(4Z,7Z,10Z,13Z,16Z,19Z-docosahexaenoyl)-sn-glycero-3-phosphocholine |
| trans-Zeatin                        | Pholedrine                                                                               |
| Pyridine                            | N-Desmethyltapentadol                                                                    |
| Mangiferdesmethylursanone           | d-Benzphetamine                                                                          |
| 3-Phosphoglyceraldehyde             | Isoproturon                                                                              |
| 1-Phenylicosane-1,3-dione           | 2-Acetylaminofluorene                                                                    |
| Rimantadine                         | 3-Hydroxydodecanoic acid                                                                 |
| Palmyramide A                       | Bis(2-ethylhexyl) adipate                                                                |
| 2-Methylpropyl formate              | Carnitine C13:1                                                                          |
| N-Methylene-ethenamine              | 1,3-Diaminopropane                                                                       |
| Tuberonic acid                      | Ephedrine                                                                                |
| PC(18:0/20:4(5Z,8Z,11Z,14Z))        | PC(18:3/18:3)                                                                            |
| N,N-Bis(2-hydroxyethyl)dodecanamide |                                                                                          |

---
